# Supplementary material for: Texturing of pure and doped CeO2thin films by EBPVD through target engineering
Source: Royal Society of Chemistry journal article supplement (doi:10.1039/c4ra04353g), 2014-07-18
Supplement: c4ra04353g1.pdf [file c4ra04353g1.pdf]

## Electronic Supplementary Information

### Texturing of pure and doped CeO<sub>2</sub> thin films by EBPVD through target engineering

P Arunkumar, R Ramaseshan, S Dash, Joysurya Basu, T R Ravindran, S Balakumar, and K Suresh Babu

Atomic Force Microscope (AFM) analysis was carried out to know the surface morphology of deposited thin film. Figure 5 shows the representative AFM images of CeO<sub>2</sub> and SDC film deposited from the target material annealed at 500 °C. Difference in surface morphology were observed between CeO<sub>2</sub> and SDC film. The average roughness ( $R_a$ ) calculated from the AFM image shows that the CeO<sub>2</sub> film ( $R_a = 9.754$  nm) have higher roughness compared to SDC film ( $R_a = 4.871$  nm). The crystallite size calculated from Scherer's formula shows that the SDC film have lower crystallite compared to CeO<sub>2</sub> film. Thus the lower crystallite size for SDC film leads to the lower  $R_a$  compared to that of CeO<sub>2</sub> film under similar deposition condition. Both CeO<sub>2</sub> and SDC film have  $R_a$  value lower than 10 nm indicates the lower aggregation of grain with minimum pore formation during the growth of the thin film.

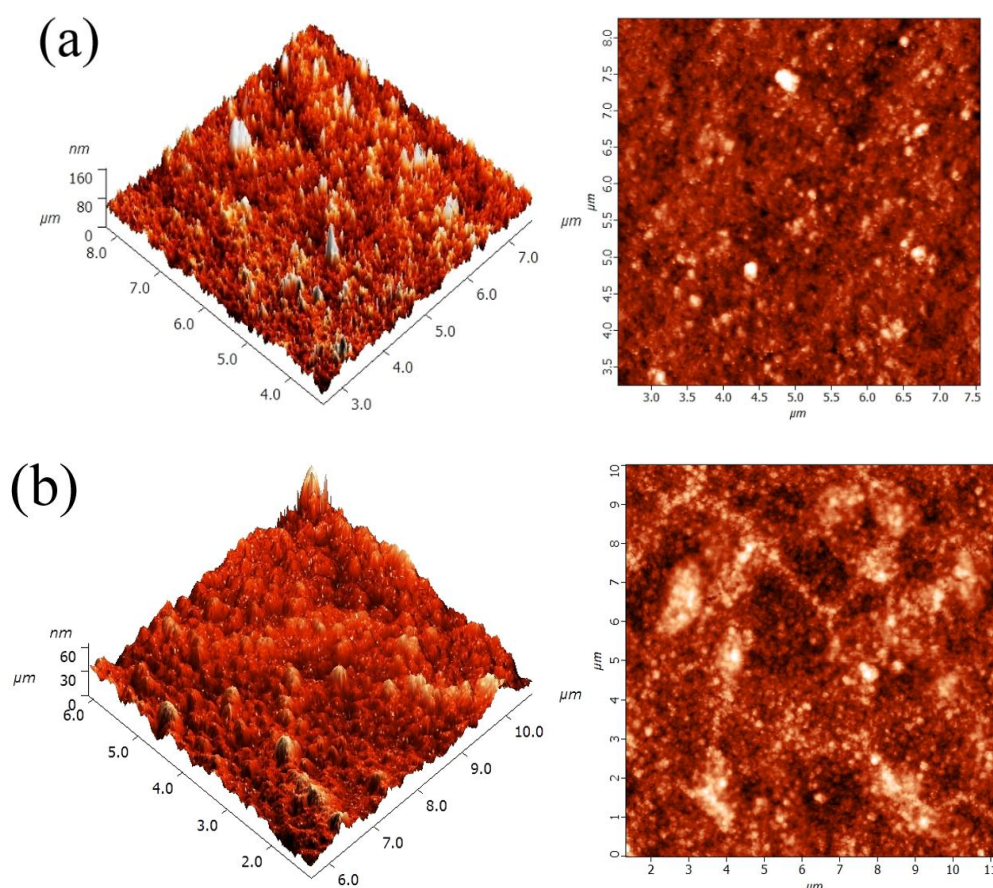

Supplementary Figure 1. AFM image of (a) CeO<sub>2</sub> and (b) SDC film deposited from the target material annealed at 500 °C were taken in non-contact mode using a Solver Pro from NTMDT, Russia.
